# Supplementary material for: Scalable Production of Size-Controlled Cholangiocyte and Cholangiocarcinoma Organoids within Liver Extracellular Matrix-Containing Microcapsules
Source: MDPI journal article supplement (doi:10.3390/cells11223657), 2022-11-18
Supplement: s1 [file s1]

# **Scalable production of size-controlled cholangiocyte and cholangiocarcinoma organoids within liver extracellular matrix-containing microcapsules**

Gilles S. van Tienderen<sup>1\*</sup>, Jorke Willemse<sup>1\*</sup>, Bas van Loo<sup>2\*</sup>, Eline van Hengel<sup>1</sup>, Jeroen de Jonge<sup>1</sup>, Luc J.W. van der Laan<sup>1</sup>, Jeroen C.H. Leijten<sup>2</sup> & Monique M.A. Verstegen<sup>1</sup>

<sup>1</sup> Erasmus MC Transplant Institute, Department of Surgery, University Medical Center Rotterdam, the Netherlands

<sup>2</sup> Department of Developmental BioEngineering, Faculty of Science and Technology, Technical Medical Centre, University of Twente, Enschede, the Netherlands

\* Shared first authorship

Correspondence: Monique MA Verstegen

Email address: m.verstegen@erasmusmc.nl

Dr. Molewaterplein 40, Room Na1005

3015 GD, Rotterdam, The Netherlands

Phone: +31 10 703 5528

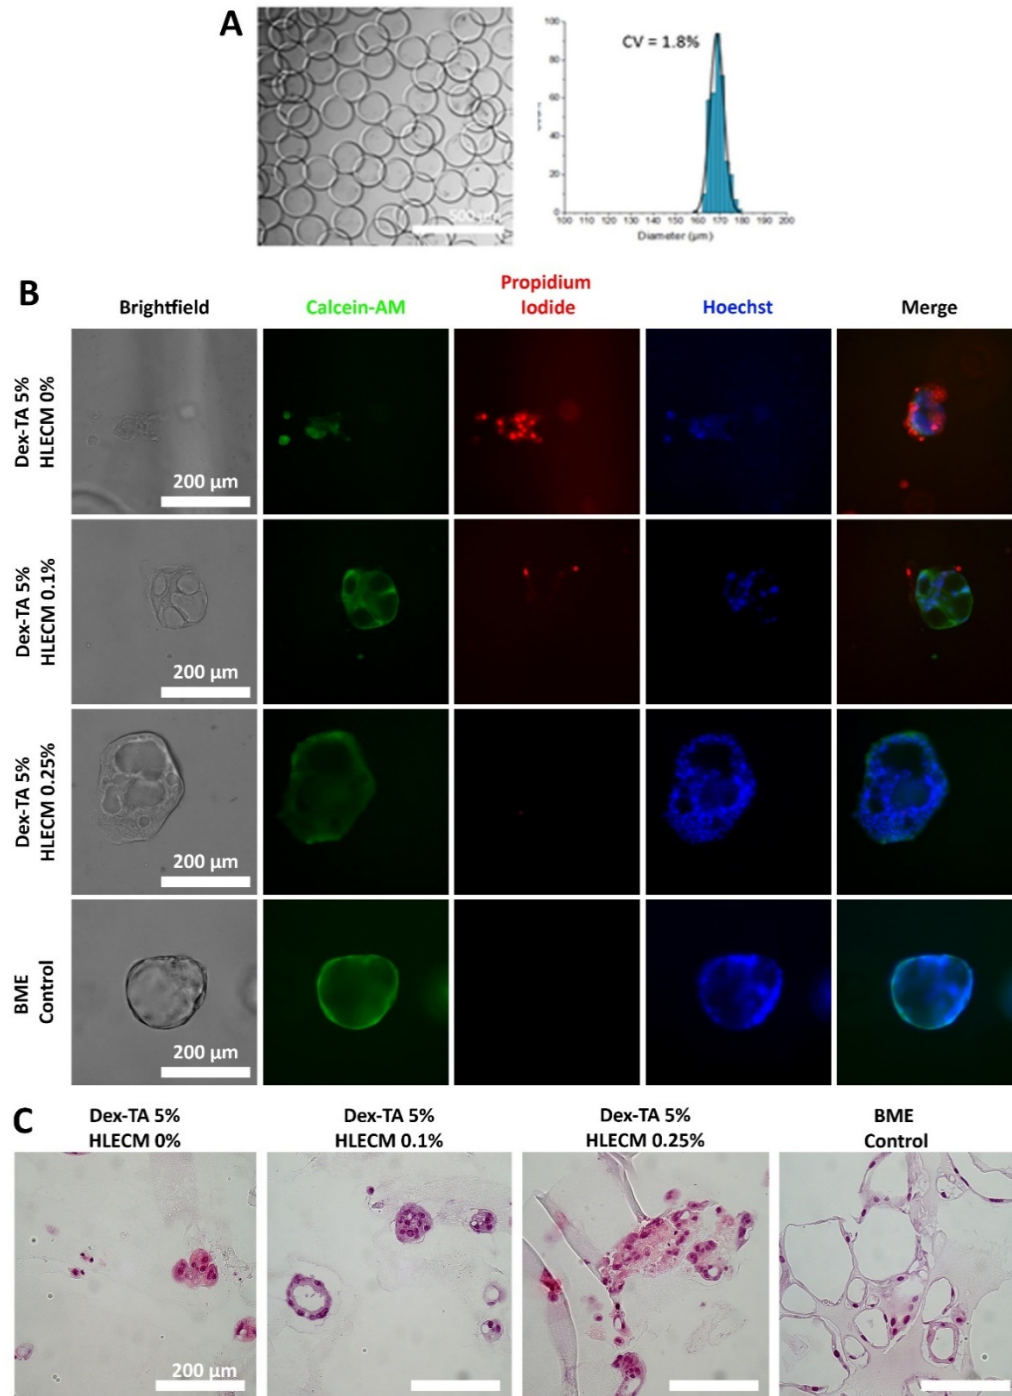

**Supplemental Figure S1: ICO can self-assemble within Dex-Ta microgel, but can only survive with the addition of HLECM. A)** Microcapsules can be produced with high monodispersity (CV=1.8%). **B)** Addition of HLECM to Dex-Ta increases cell viability, **C)** and allows for the self-organization of cells into organoid-like structures.

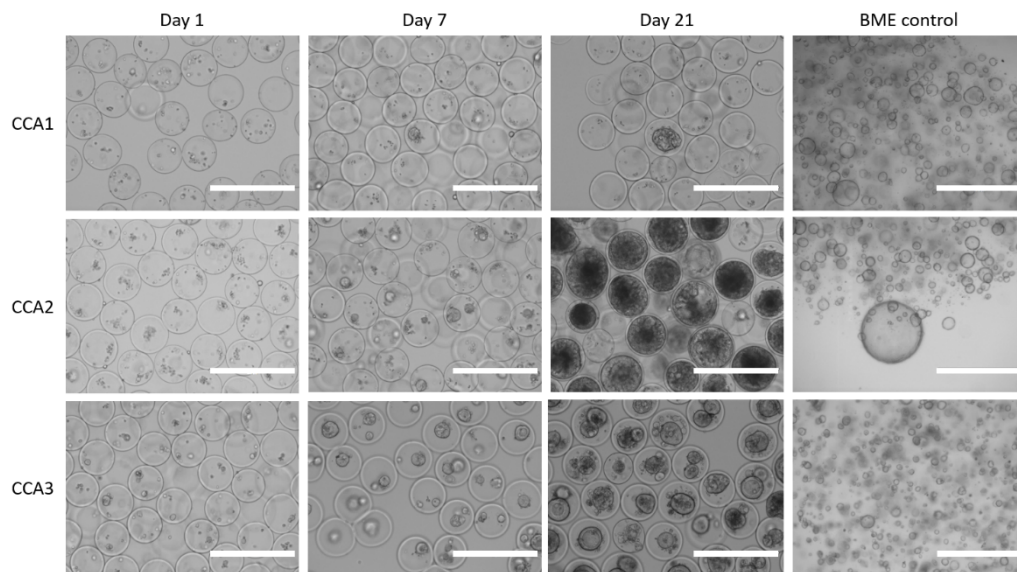

**Supplemental Figure S2. CCAO formation in microcapsules.** Representative bright field micrographs of CCAO cultured in BME control for 7 days or cultured in microcapsules for 1, 7, and 21 days. Scale bar indicates 400  $\mu\text{m}$ .

**Table S1.** Medium components required for the formulation of basal medium (ADV+)

| Component         | Amount | Concentration | Brand             |
|-------------------|--------|---------------|-------------------|
| Advanced DMEM/F12 | 500ml  |               | Gibco             |
| HEPES             | 5ml    | 1M            | Life technologies |
| L-Glutamin        | 5ml    | 100X          | Life technologies |
| Primocin          | 1ml    | 500mg/ml      | Invivogen         |
| Pen/Strep         | 5ml    | 10000 U/ml    | Life technologies |

**Table S2.** Medium components required for the formulation of Start Up Medium (SEM) or Expansion Medium (EM). Medium components with a \* are only added to SEM.

| Component       | Concentration    | Brand              |
|-----------------|------------------|--------------------|
| Adv+            | -                | Gibco              |
| N2              | 1%               | Gibco              |
| B27             | 2%               | Gibco              |
| N-Acetylcystein | 1mM              | Sigma-Aldrich      |
| gastrin         | 10 nM            | Sigma-Aldrich      |
| EGF             | 50 ng/ml         | Peprtech           |
| FGF10           | 100 ng/ml        | Peprtech           |
| HGF             | 25 ng/ml         | Peprtech           |
| nicotinamide    | 10nM             | Sigma-Aldrich      |
| A83.01          | 5 $\mu\text{M}$  | Tocris             |
| Forskolin       | 10 $\mu\text{M}$ | Tocris             |
| R-Spondin       | 10%              | Conditioned medium |
| WNT*            | 30% Wnt          | Conditioned medium |
| Noggin*         | 25 ng/ml         | Conditioned medium |
| Y27632*         | 10 $\mu\text{M}$ | Tocris             |

|                                     |                 |          |
|-------------------------------------|-----------------|----------|
| hES cell cloning recovery solution* | 1:1000 dilution | Stemgent |
|-------------------------------------|-----------------|----------|

**Table S3.** List of primary antibodies used in this study

| Primary antibody | Raised in | Dilution      | Supplier                 |
|------------------|-----------|---------------|--------------------------|
| ZO1              | Rabbit    | 1:100         | Proteintech              |
| KRT7             | Mouse     | 1:100         | Dako                     |
| KRT19            | Mouse     | 1:100         | Dako                     |
| KI67             | Rabbit    | Ready –to-use | Kind gift from pathology |

**Table S4.** List of fluorescent labeled secondary antibodies used in this study

| Secondary antibody | Raised in | Against | Dilution | Supplier          |
|--------------------|-----------|---------|----------|-------------------|
| Alexa 555          | Goat      | Mouse   | 1:100    | Fisher scientific |
| Alexa 488          | Goat      | Rabbit  | 1:100    | Fisher scientific |

**Table S5.** List of qPCR primers used in this study

| Primer        | Species | Forward sequence 5'to 3' | Reverse sequence 5'to 3' |
|---------------|---------|--------------------------|--------------------------|
| GAPDH         | Human   | CTTTTGCCTCGCCAGCCGAG     | CCAGGCGCCCAATACGACCA     |
| HPRT1         | Human   | ACCAGTCAACAGGGGACATAA    | CTTCGTGGGGTCTTTTCACC     |
| B2M           | Human   | GTGTCTGGGTTTCATCCATC     | GGCAGGCATACTCATCTTTT     |
| LGR5          | Human   | GTCAGCTGCTCCCGAATCCC     | TGAAACAGCTTGGGGGCACA     |
| PROM1         | Human   | CCTGGGGCTGCTGTTTATTA     | ATCACCAACAGGGAGATTGC     |
| KRT7          | Human   | GGGGACGACCTCCGGAATAC     | CTTGGCACGCTGGTTCTTGA     |
| KRT19         | Human   | GCACTACAGCCACTACTACACGA  | CTCATGCGCAGAGCCTGTT      |
| EPCAM         | Human   | GACTTTTGCCGCAGCTCAGGA    | AGCAGTTTACGGCCAGCTTGT    |
| MUC1          | Human   | CTGTCACTGCCGCCGAAGA      | CGTGCCCCTACAAGTTGGCA     |
| KI67          | Human   | CTACGGATTATACCTGGCCTTCC  | AGGAAGCTGGATACGGATGTCA   |
| Vimentin      | Human   | CGGGAGAAATTGCAGGAGG      | TGCTGTTCTGAATCTGAGC      |
| Albumin       | Human   | CTGCCTGCCTGTTGCCAAAGC    | GGCAAGGTCCGCCCTGTCATC    |
| CYP3a4        | Human   | AGCAAAGAGCAACACAGAGCTGAA | CAGAGGTGTGGGCCCTGGAAT    |
| HNF4 $\alpha$ | Human   | GTA CTCTGCAGATTTAGCC     | CTGTCCTCATAGCTTGACCT     |
| ITGB1         | Human   | GGACGCCGCGCGGAAAAGAT     | CACCCACAATTTGGCCCTGCT    |
| ITGA5         | Human   | AGGGTCGGGGGCTTCAACTTA    | GAGCGGCAGGGTGCATACTC     |
